# Supplementary material for: Probing biotin receptors in cancer cells with rationally designed fluorogenic squaraine dimers
Source: Royal Society of Chemistry journal article supplement (doi:10.1039/d0sc01973a), 2020-01-01
Supplement: d0sc01973a1.pdf [file d0sc01973a1.pdf]

## Probing biotin receptors in cancer cells with rationally designed fluorogenic squaraine dimers

Kyong T. Fam,<sup>a</sup> Mayeul Collot\*<sup>a</sup> and Andrey Klymchenko\*<sup>a</sup>

<sup>a</sup> Nanochemistry and Bioimaging group, Laboratoire de Bioimagerie et Pathologies, CNRS UMR 7021, Université de Strasbourg, Faculté de Pharmacie, 67401 Illkirch, France.

\*Corresponding authors: [andrey.klymchenko@unistra.fr](mailto:andrey.klymchenko@unistra.fr); [mayeul.collot@unistra.fr](mailto:mayeul.collot@unistra.fr)

### Supporting information

PEG7-diamine was synthesized as described elsewhere <sup>1</sup>.

N<sub>3</sub>-biotin was synthesized according to a published protocol.<sup>2</sup>

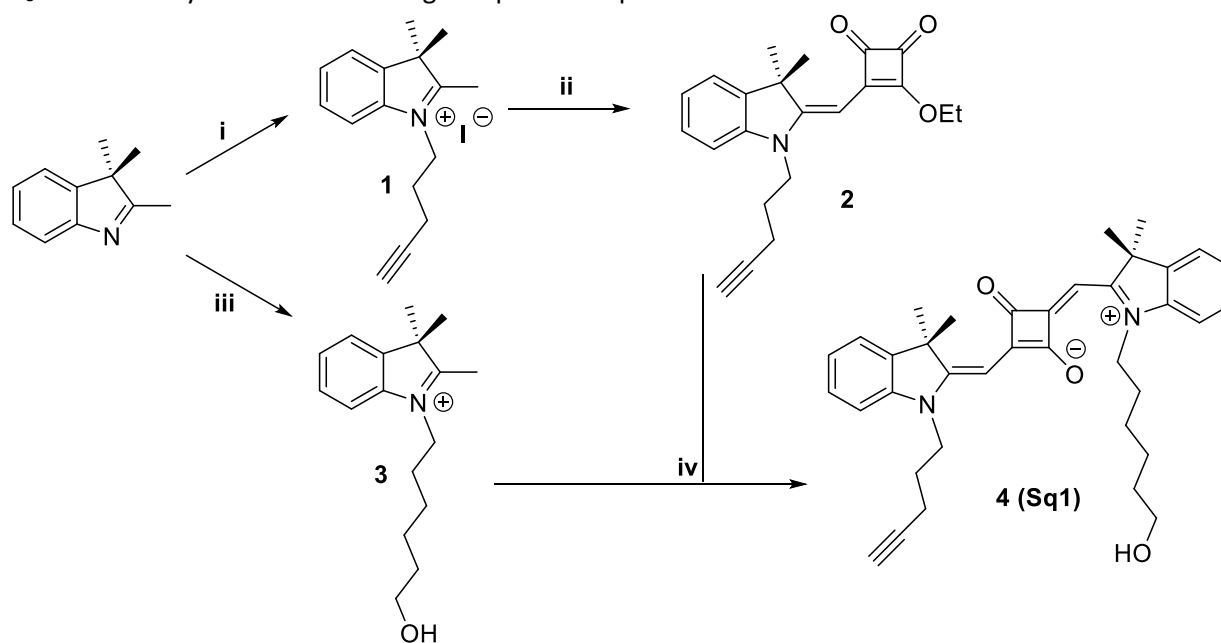

**Scheme S1.** Synthesis of Sq1. i) 5-chloro-1-pentyne, KI, CH<sub>3</sub>CN, 85°C, 48h (20%); ii) Diethyl squarate, Et<sub>3</sub>N, EtOH, 80°C, 6h (36%); iii) 6-chloro-1-hexanol, KI, CH<sub>3</sub>CN, 110°C, 12h (12%); iv) pyridine, 125°C, 18h (31%)

Compound 1 was synthesized according to a published protocol.<sup>3</sup>

**Synthesis of compound 2.** Compound 1 (1.2 g, 3.4 mmol, 1 eq), diethyl squarate (578 mg, 3.4 mmol, 1 eq) and Et<sub>3</sub>N (g, mmol, 2.7 eq) were dissolved in EtOH (20 mL). The mixture was refluxed overnight. The solvents were then removed under vacuum and the crude product was purified by column chromatography with Heptane/EtOAc (7/3) as eluent. Yellow solid was obtained, yield 36%.

<sup>1</sup>H NMR (400 MHz, Chloroform-d) δ 7.25 – 7.16 (m, 2H), 7.01 (td, J = 7.4, 0.9 Hz, 1H), 6.93 – 6.87 (m, 1H), 5.41 (s, 1H), 4.82 (q, J = 7.1 Hz, 2H), 3.91 (t, J = 7.4 Hz, 2H), 2.26 (td, J = 6.7, 2.6 Hz, 2H), 2.06 (t, J = 2.6 Hz, 1H), 1.91 (p, J = 6.9 Hz, 2H), 1.56 (s, 6H), 1.46 (t, J = 7.1 Hz, 3H). <sup>13</sup>C NMR (101 MHz, Chloroform-d) δ 192.35, 187.81, 187.72, 173.87, 168.23, 142.60, 140.83, 127.82, 122.75, 122.02, 108.32, 82.69, 81.57, 70.09, 69.93, 47.94, 41.54, 27.06, 25.11, 16.13, 15.92. HRMS (ES+) Calc. for C<sub>22</sub>H<sub>23</sub>NO<sub>3</sub> [M+H]<sup>+</sup> 350.1678, found 350.1757.

**Synthesis of compound 3.** 2,3,3-trimethylindolenine (1 eq, 9.54g), 6-chloro-1-hexanol (1 eq, 8.16 g) and potassium iodide (2.2 eq, 21.9 g) were dissolved in CH<sub>3</sub>CN (75mL), the reaction was heated up to 110°C under stirring overnight. The solvent was then removed under vacuum and the crude product was dissolved in a small amount of acetone. The mixture is then precipitated in cold ether, three times to obtain the maximum of product. Pink crystals were obtained, yield 12%.

<sup>1</sup>H NMR (400 MHz, Chloroform-d) δ 7.74 – 7.64 (m, 1H), 7.59 – 7.46 (m, 4H), 5.24 (s, 1H), 3.54 (t, J = 5.9 Hz, 2H), 3.07 (s, 3H), 1.93 (t, J = 7.6 Hz, 2H), 1.59 (s, 6H), 1.55-1.42 (m, 8H). <sup>13</sup>C NMR (101 MHz, Chloroform-d) δ 195.69, 141.65, 140.94, 130.16, 129.65, 123.35, 115.62, 61.71, 49.88, 32.00, 28.01, 26.31, 25.26, 23.44, 23.26, 17.13.

**Synthesis of 4 (Sq1).** Compound 3 (244 mg, 0.63 mmol, 1.1 eq) and compound 2 (200 mg, 0.573 mmol, 1 eq) were dissolved in 5 mL of pyridine. After 5 h the solution turns green. The solvent was removed under vacuum and the crude product was purified by column chromatography with EtOAc/MeOH (95/5) as eluent. Blue-green powder was obtained, yield 31%.

<sup>1</sup>H NMR (400 MHz, Chloroform-d) δ 7.28 (d, J = 1.2 Hz, 1H), 7.26 (d, J = 1.1 Hz, 2H), 7.24 (dd, J = 2.5, 1.2 Hz, 2H), 7.22 (d, J = 1.3 Hz, 2H), 7.20 (d, J = 1.2 Hz, 1H), 7.09 – 7.00 (m, 5H), 6.93 (s, 1H), 6.91 (s, 1H), 5.92 (s, 2H), 3.93 (s, 4H), 3.61 (t, J = 6.1 Hz, 4H), 2.26 (d, J = 2.7 Hz, 2H), 1.95 (s, 3H), 1.79 – 1.72 (m, 3H), 1.69 (d, J = 3.9 Hz, 27H), 1.58 – 1.49 (m, 3H), 1.45 (dh, J = 9.0, 2.3, 1.8 Hz, 6H). <sup>13</sup>C NMR (126 MHz, Chloroform-d) δ 179.62, 170.54, 169.73, 142.47, 142.26, 127.85, 127.83, 123.91, 123.71, 122.32, 122.29, 109.49, 109.31, 86.78, 82.71, 70.21, 62.40, 49.37, 49.21, 43.21, 42.23, 32.43, 27.14, 26.98, 26.25, 26.24, 25.62, 24.93, 16.11. HRMS (ES+) Calc. for C<sub>37</sub>H<sub>42</sub>N<sub>2</sub>O<sub>3</sub> [M+H]<sup>+</sup> 563.3195, found 563.3265.

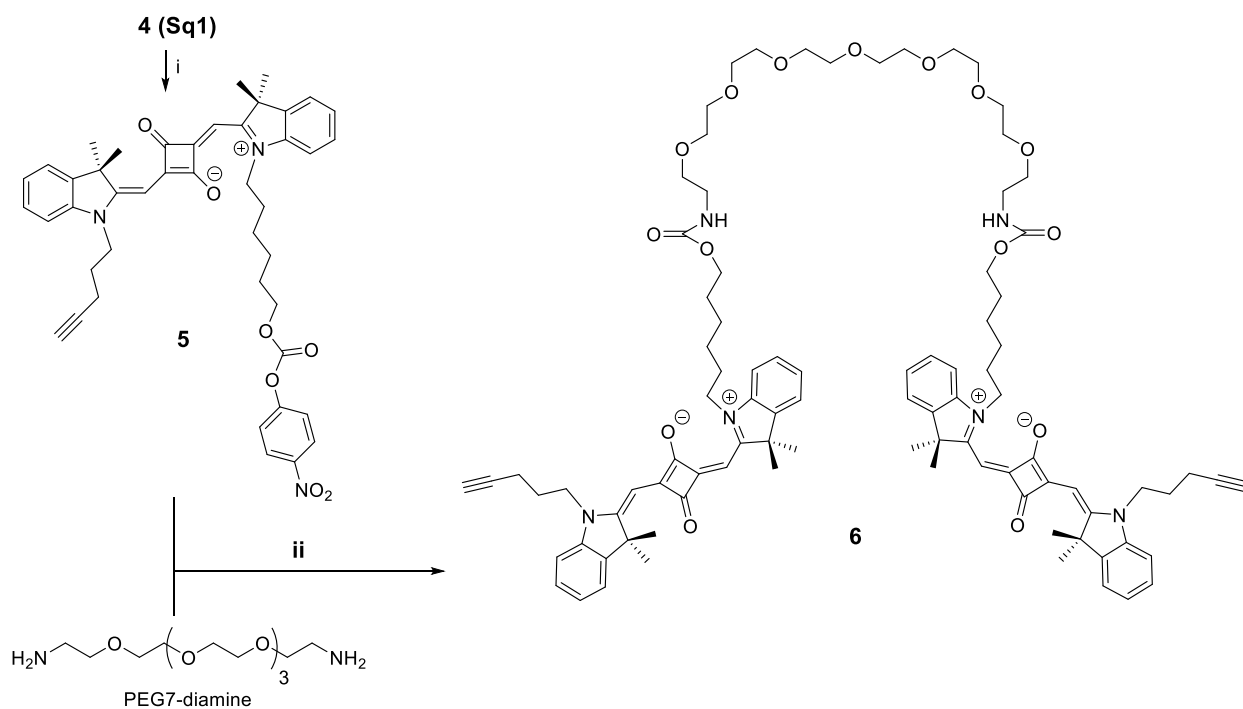

**Scheme S2.** Synthesis of 6. i) pyridine, DCM, r.t., 3 h (61%); ii) DIEA, DMF, 60°C, 18h (21%);

**Synthesis of compound 5.** Compound 4 (260 mg, 0.462 mmol, 1 eq) was dissolved in DCM, followed by pyridine (112 μL, 1.386 mmol, 3 eq) addition and 4-nitrophenyl chloroformate (186 mg, 0.924 mmol, 2 eq).

Reaction was left stirring for 3 hours at room temperature. The solvent was evaporated and the residue was purified on column EtOAc/DCM (3/7). Yield, 61%.

$^1\text{H}$  NMR (400 MHz, Chloroform- $d$ )  $\delta$  8.21 (d, 2H), 7.32-7.26 (m, 6H), 7.1-7 (m, 3H), 6.9 (d, 2H), 5.89 (s, 2H), 4.22 (t, 2H), 4.07-4.04 (m, 4H), 2.3 (m, 2H), 2.09 (s, 1H), 1.99 (m, 2H), 1.8 (m, 4H), 1.77 (s, 12H), 1.55 (m, 4H), 1.44 (m, 4H), (d,  $J = 3.9$  Hz, 27H), 1.58 – 1.49 (m, 3H), 1.45 (dh,  $J = 9.0, 2.3, 1.8$  Hz, 6H).  $^{13}\text{C}$  NMR (100 MHz, Chloroform- $d$ )  $\delta$  127.88, 125.29, 123.82, 109.31 86.65, 69.28, 49.42, 28.43, 27.18, 27.11, 26.99, 25.67, 25.57, 16.17. HRMS (ES+) Calc. for  $\text{C}_{44}\text{H}_{45}\text{N}_3\text{O}_7$   $[\text{M}+\text{H}]^+$  728.3258, found 728.3327.

**Synthesis of 6.** Compound **5** (60 mg, 2eq) and PEG7-diamine (15 mg, 1 eq) were dissolved in DMF and DIEA (26 mg, 5 eq) was added. The mixture was left to stir overnight at  $60^\circ\text{C}$ . The solvent was removed under vacuum and the crude was dissolved in DCM. The solution was washed with concentrated solution of  $\text{NaHCO}_3$ , dried over  $\text{MgSO}_4$  and concentrated. The residue was purified by column chromatography with DCM/MeOH (97/3) as eluent. Yield 21%.

$^1\text{H}$  NMR (500 MHz, Chloroform- $d$ )  $\delta$  7.29-7.27 (m, 8H), 7.09-7.02 (m, 6H), 6.91 (d, 2H), 5.88 (s, 4H), 3.98 (m, 12H), 3.57 (t, 28H), 3.29 (t, 4H), 2.29 (m, 4H), 1.98 (m, 6H), 1.75 (s, 24H), 1.54 (m, 4H), 1.36 (m, 8H).  $^{13}\text{C}$  NMR (126 MHz, Chloroform- $d$ )  $\delta$  180.26, 179.38, 170.43, 169.69, 156.83, 142.36, 127.85, 123.88, 122.36, 109.46, 86.68, 70.29, 64.63, 49.43, 43.67, 42.24, 40.78, 28.94, 27.2, 27.06, 26.76, 25.77, 16.17. HRMS (ES+) Calc. for  $\text{C}_{92}\text{H}_{116}\text{N}_6\text{O}_{15}$   $[\text{M}+\text{H}]^+$  1544.8499, found 1545.8536

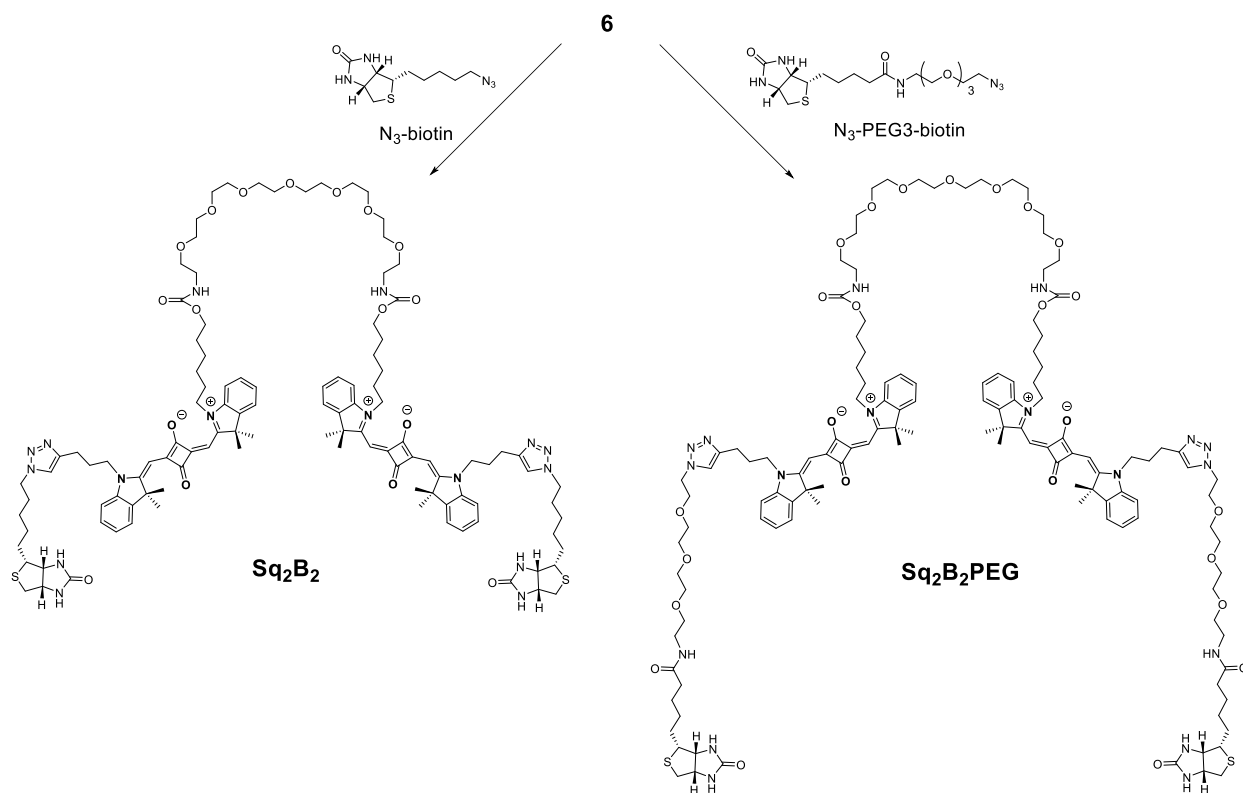

**Scheme S3.** Synthesis of  $\text{Sq}_2\text{B}_2$  and  $\text{Sq}_2\text{B}_2\text{PEG}$ .  $\text{CuSO}_4 \cdot 5\text{H}_2\text{O}$ , sodium ascorbate, DMF/water (3/1),  $60^\circ\text{C}$ , 18h

#### General protocol for synthesis of $\text{Sq}_2\text{B}_2$ and $\text{Sq}_2\text{B}_2\text{PEG}$ .

**6** (1eq) and  $\text{N}_3$ -biotin (2.4 eq) or  $\text{N}_3$ -PEG3-biotin (2.4 eq) were dissolved in a mixture DMF/water (3/1).  $\text{CuSO}_4 \cdot 5\text{H}_2\text{O}$  and sodium ascorbate were dissolved in an eppendorf with water and the solution was mixed until the mixture turn yellow. The content of the eppendorf was then added to the mixture and the

reaction was stirred at 60°C overnight. The solvent was then removed under vacuum, the crude product was dissolved in DCM, washed with 0.05 M EDTA solution, dried over MgSO<sub>4</sub> and concentrated. The crude was purified by column chromatography in the gradient of eluent DCM/MeOH (9/1 to 7/3) to yield blue syrup (44% for Sq<sub>2</sub>B<sub>2</sub>, 70% for Sq<sub>2</sub>B<sub>2</sub>PEG)

**Sq<sub>2</sub>B<sub>2</sub>**<sup>1</sup>H NMR (400 MHz, Chloroform-d) δ 7.54 (s, 2H), 7.28 (dd, J = 7.8, 6.6 Hz, 5H), 7.23 (dd, J = 7.7, 1.3 Hz, 3H), 7.07 (q, J = 7.1 Hz, 4H), 6.94 (dd, J = 16.5, 7.9 Hz, 4H), 5.98 (s, 2H), 5.87 (d, J = 11.3 Hz, 4H), 5.48 (d, J = 8.7 Hz, 3H), 4.45 – 4.35 (m, 2H), 4.32 (t, J = 7.2 Hz, 4H), 4.19 (dd, J = 8.5, 4.5 Hz, 2H), 4.04 – 3.84 (m, 14H), 3.55 (d, J = 7.4 Hz, 27H), 3.47 (t, J = 5.2 Hz, 4H), 3.41 (s, 1H), 3.28 (q, J = 5.6 Hz, 4H), 3.06 – 2.98 (m, 2H), 2.83 – 2.73 (m, 7H), 2.64 (d, J = 12.7 Hz, 2H), 2.22 – 2.04 (m, 14H), 1.84 (q, J = 7.3 Hz, 4H), 1.70 (d, J = 2.4 Hz, 26H), 1.60 – 1.48 (m, 7H), 1.35 (ddt, J = 24.5, 16.7, 7.2 Hz, 18H). <sup>13</sup>C NMR (101 MHz, Chloroform-d) δ 178.92, 170.15, 127.92, 127.85, 123.82, 122.32, 122.24, 121.55, 109.69, 109.46, 86.59, 70.51, 70.48, 70.23, 70.16, 64.62, 62.01, 60.14, 55.61, 50.12, 49.30, 43.62, 42.89, 40.76, 40.51, 29.93, 28.91, 28.47, 28.38, 27.10, 27.05, 26.99, 26.70, 26.41, 26.29, 25.73, 22.92. HRMS (ES+) Calc. for C<sub>112</sub>H<sub>150</sub>N<sub>16</sub>O<sub>14</sub>S<sub>2</sub> [M+H]<sup>+</sup> 2056.0806, found 2056.0832

**Sq<sub>2</sub>B<sub>2</sub>PEG**: <sup>1</sup>H NMR (500 MHz, Chloroform-d) δ 7.92 (s, 2H), 7.46 (t, 4H), 7.39-7.35 (q, 4H), 7.27-7.19 (m, 8H), 5.99 (d, 4H), 4.594 (t, 4H), 4.035 (t, 4H), 3.62-3.59 (m, 34H), 3.56-3.48 (m, 16H), 3.34 (p, 16H), 3.28 (t, 4H), 3.18 (p, 4H), 2.93-2.29 (m, 6H), 2.69 (d, 2H), 2.25-2.18 (m, 8H), 1.96 (s, 64H), 1.85-1.83 (m, 4H), 1.76 (d, 24H), 1.73-1.58 (m, 10H), 1.45-1.38 (p, 5H). <sup>13</sup>C NMR (126 MHz, Chloroform-d) δ 184.57, 180.42, 177.20, 176.56, 176.11, 172.51, 172.00, 166.12, 159.34, 143.72, 143.42, 143.26, 129.42, 129.41, 125.65, 125.50, 124.44, 123.51, 111.63, 111.46, 87.36, 87.22, 71.64, 71.56, 71.52, 71.42, 71.37, 71.28, 70.69, 70.52, 65.87, 63.47, 61.73, 57.11, 51.46, 50.74, 50.62, 44.79, 44.12, 41.73, 41.19, 40.46, 36.85, 30.88, 30.23, 29.90, 29.84, 29.63, 28.31, 27.84, 27.73, 27.57, 27.47, 26.96, 23.80, 23.71, 23.67. HRMS (ES+) Calc. for C<sub>128</sub>H<sub>180</sub>N<sub>18</sub>O<sub>25</sub>S<sub>2</sub> [M+H]<sup>+</sup> 2433.2808, found 2433.2624

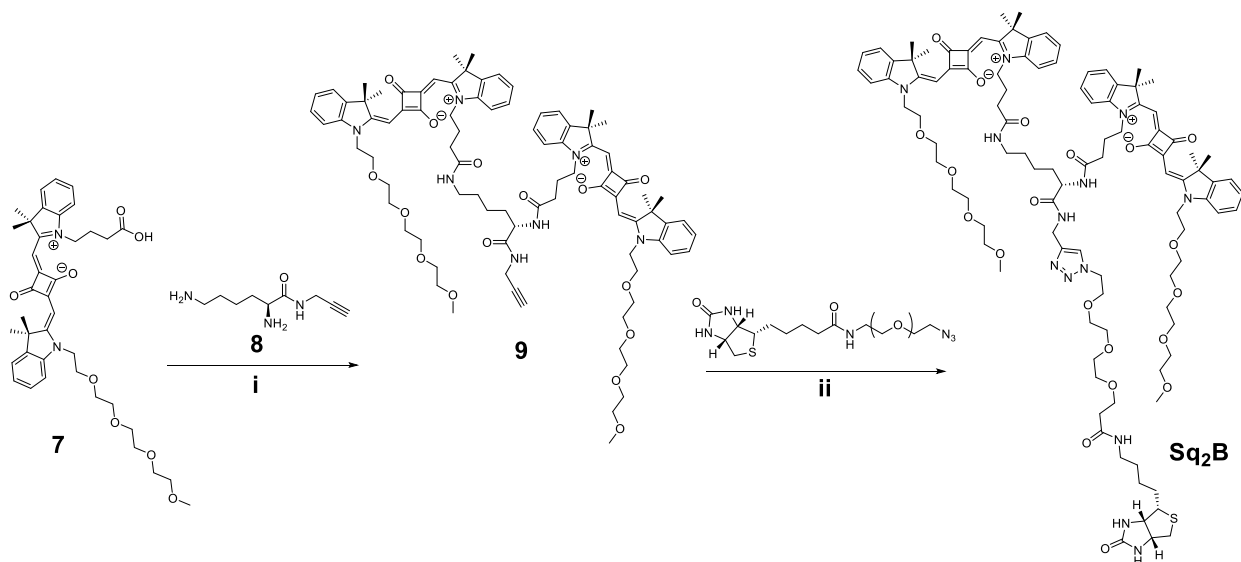

**Scheme S4.** Synthesis of Sq<sub>2</sub>B. i) HATU, DIEA, DMF, r.t., 1h (50%); ii) CuSO<sub>4</sub>·5H<sub>2</sub>O, sodium ascorbate, DMF/water (3/1), 60°C, 18h (60%).

Compound **7** and **8** were synthesized according to a published protocols.<sup>4,5</sup>

**Synthesis of compound 9.** To a solution of **7** (40 mg, 0.06 mmol, 2 eq) and **8** (12 mg, 0.03 mmol, 1 eq) in DMF (3 mL) was added HATU (54 mg, 0.14 mmol, 1.2 eq) followed by DIEA (62 μL, 0.36 mmol, 12 eq). After 1 h the solvents were evaporated and the crude was first purified by column chromatography on silica gel (DCM/MeOH: 8/2). Yield 50%.

$^1\text{H}$  NMR (500 MHz, Chloroform- $d$ )  $\delta$  10.96 (s, 1H), 7.96 (s, 1H), 7.53 (s, 2H), 7.32 – 7.26 (m, 0H), 7.28 – 7.20 (m, 5H), 7.21 (d,  $J$  = 1.6 Hz, 2H), 7.22 – 7.16 (m, 1H), 7.09 (d,  $J$  = 7.9 Hz, 1H), 7.10 – 7.00 (m, 7H), 6.93 (d,  $J$  = 14.6 Hz, 1H), 5.93 (d,  $J$  = 8.2 Hz, 2H), 5.86 (s, 2H), 4.48 (q,  $J$  = 7.4 Hz, 1H), 4.17 (s, 5H), 4.04 (s, 3H), 3.92 (ddd,  $J$  = 8.8, 5.4, 2.5 Hz, 2H), 3.77 (td,  $J$  = 5.9, 1.7 Hz, 4H), 3.62 (p,  $J$  = 6.7 Hz, 2H), 3.55 – 3.41 (m, 22H), 3.28 (s, 5H), 3.21 (dq,  $J$  = 13.9, 6.8 Hz, 2H), 3.04 (q,  $J$  = 7.4 Hz, 2H), 2.42 (t,  $J$  = 6.7 Hz, 2H), 2.37 (t,  $J$  = 6.9 Hz, 2H), 2.11 – 1.96 (m, 2H), 1.79 (t,  $J$  = 7.2 Hz, 1H), 1.66 (d,  $J$  = 12.7 Hz, 25H), 1.51 (dq,  $J$  = 21.9, 7.7, 7.3 Hz, 2H), 1.42 – 1.27 (m, 17H), 1.20 (d,  $J$  = 15.5 Hz, 6H), 0.80 (q,  $J$  = 10.5, 8.6 Hz, 1H).  $^{13}\text{C}$  NMR (126 MHz, Chloroform- $d$ )  $\delta$  172.32, 142.94, 142.06, 128.09, 127.72, 124.12, 123.81, 123.73, 122.25, 122.02, 110.24, 110.09, 109.85, 79.70, 71.84, 71.82, 71.17, 71.05, 70.54, 70.39, 70.37, 67.65, 59.01, 53.58, 49.49, 49.43, 49.23, 43.91, 43.17, 42.95, 41.96, 38.76, 32.83, 32.42, 30.31, 29.69, 29.03, 28.61, 27.12, 26.95, 22.80, 22.61, 22.52, 18.57, 17.45, 11.84. Calc. for  $\text{C}_{87}\text{H}_{109}\text{N}_7\text{O}_{15}$   $[\text{M}]^+$  1492.7982, found 1491.7989.

Synthesis of **Sq<sub>2</sub>B** and **SqB** was done following general protocol for synthesis of **Sq<sub>2</sub>B<sub>2</sub>** and **Sq<sub>2</sub>B<sub>2</sub>PEG**.

**Sq<sub>2</sub>B**:  $^1\text{H}$  NMR (400 MHz, Chloroform- $d$ )  $\delta$  10.04 – 9.99 (m, 15H), 8.04 (d,  $J$  = 6.8 Hz, 1H), 7.94 (s, 1H), 7.72 (d,  $J$  = 7.3 Hz, 1H), 7.52 (d,  $J$  = 6.0 Hz, 1H), 7.40 (s, 1H), 7.32 (td,  $J$  = 11.7, 9.6, 5.2 Hz, 9H), 7.18 (qd,  $J$  = 8.9, 7.7, 3.9 Hz, 9H), 6.52 (s, 3H), 6.07 (s, 1H), 6.02 (s, 1H), 5.94 (d,  $J$  = 14.5 Hz, 2H), 4.62 – 4.55 (m, 1H), 4.59 – 4.47 (m, 4H), 4.39 (dd,  $J$  = 8.0, 4.8 Hz, 2H), 4.25 (d,  $J$  = 5.6 Hz, 4H), 4.07 (t,  $J$  = 8.1 Hz, 4H), 3.95 (s, 1H), 3.84 (d,  $J$  = 5.4 Hz, 6H), 3.53 (ddt,  $J$  = 10.0, 6.6, 4.1 Hz, 35H), 3.46 – 3.38 (m, 2H), 3.34 (s, 6H), 3.18 (dq,  $J$  = 18.7, 6.7 Hz, 3H), 2.90 (dd,  $J$  = 13.2, 4.8 Hz, 1H), 2.76 (d,  $J$  = 13.0 Hz, 1H), 2.52 (t,  $J$  = 7.3 Hz, 4H), 2.24 (t,  $J$  = 7.5 Hz, 2H), 2.08 (q,  $J$  = 8.7, 7.8 Hz, 5H), 1.79 (s, 1H), 1.70 (s, 17H), 1.62 (t,  $J$  = 7.4 Hz, 1H), 1.57 – 1.49 (m, 1H), 1.46 – 1.38 (m, 1H), 1.37 (s, 3H).  $^{13}\text{C}$  NMR (126 MHz, Chloroform- $d$ )  $\delta$  175.53, 172.86, 142.02, 141.86, 141.58, 128.04, 125.35, 125.19, 124.90, 122.20, 122.09, 114.23, 111.19, 111.11, 110.90, 110.65, 71.79, 71.00, 70.98, 70.51, 70.49, 70.41, 70.37, 70.24, 70.00, 69.27, 68.80, 67.75, 62.49, 60.92, 58.91, 55.41, 51.03, 49.90, 49.85, 49.67, 49.65, 44.43, 43.38, 40.30, 39.67, 39.43, 35.16, 34.04, 32.44, 32.10, 31.20, 28.23, 27.92, 27.80, 26.54, 26.47, 26.43, 25.40, 23.35, 22.71. HRMS (ES+) Calc. for  $\text{C}_{105}\text{H}_{141}\text{N}_{13}\text{O}_{20}\text{S}$   $[\text{M}+\text{H}+\text{Na}]^+$  1960.0137, found 1960.0110

**SqB**:  $^1\text{H}$  NMR (400 MHz, Methanol- $d_4$ )  $\delta$  8.16 – 8.08 (m, 2H), 7.78 (s, 1H), 7.35 – 7.27 (m, 4H), 7.25 – 7.15 (m, 3H), 7.08 (ddt,  $J$  = 8.8, 7.8, 1.4 Hz, 3H), 5.92 (s, 1H), 5.83 (s, 1H), 4.50 – 4.44 (m, 2H), 4.37 – 4.33 (m, 1H), 4.28 – 4.22 (m, 4H), 4.16 (dd,  $J$  = 7.9, 4.4 Hz, 1H), 4.08 (td,  $J$  = 6.8, 3.0 Hz, 2H), 3.84 – 3.75 (m, 4H), 3.61 – 3.53 (m, 2H), 3.50 – 3.43 (m, 6H), 3.36 (t,  $J$  = 5.4 Hz, 2H), 3.21 (dt,  $J$  = 3.3, 1.6 Hz, 6H), 2.82 – 2.72 (m, 3H), 2.08 (dt,  $J$  = 14.7, 7.3 Hz, 4H), 1.63 (d,  $J$  = 4.2 Hz, 12H), 1.49 (dd,  $J$  = 14.7, 7.2 Hz, 2H), 1.30 (q,  $J$  = 7.5 Hz, 2H).  $^{13}\text{C}$  NMR (101 MHz, Methanol- $d_4$ )  $\delta$  183.05, 179.81 – 173.30 (m), 171.04 (d,  $J$  = 87.9 Hz), 164.63, 155.68, 152.55, 146.22, 146.14 – 141.27 (m), 127.76 (d,  $J$  = 23.7 Hz), 124.87, 123.97 (d,  $J$  = 5.0 Hz), 122.88, 110.38 (d,  $J$  = 84.5 Hz), 85.77, 73.13 – 63.93 (m), 61.08 (d,  $J$  = 175.8 Hz), 55.59, 50.76 – 48.90 (m), 43.22 (d,  $J$  = 118.9 Hz), 39.30 (d,  $J$  = 72.7 Hz), 35.33, 28.23 (d,  $J$  = 27.2 Hz), 26.31, 25.73 (d,  $J$  = 60.7 Hz), 22.29. HRMS (ES+) Calc. for  $\text{C}_{57}\text{H}_{78}\text{N}_8\text{O}_{11}\text{S}$   $[\text{M}+\text{Na}]^+$  1105.5511, found 1105.5420.

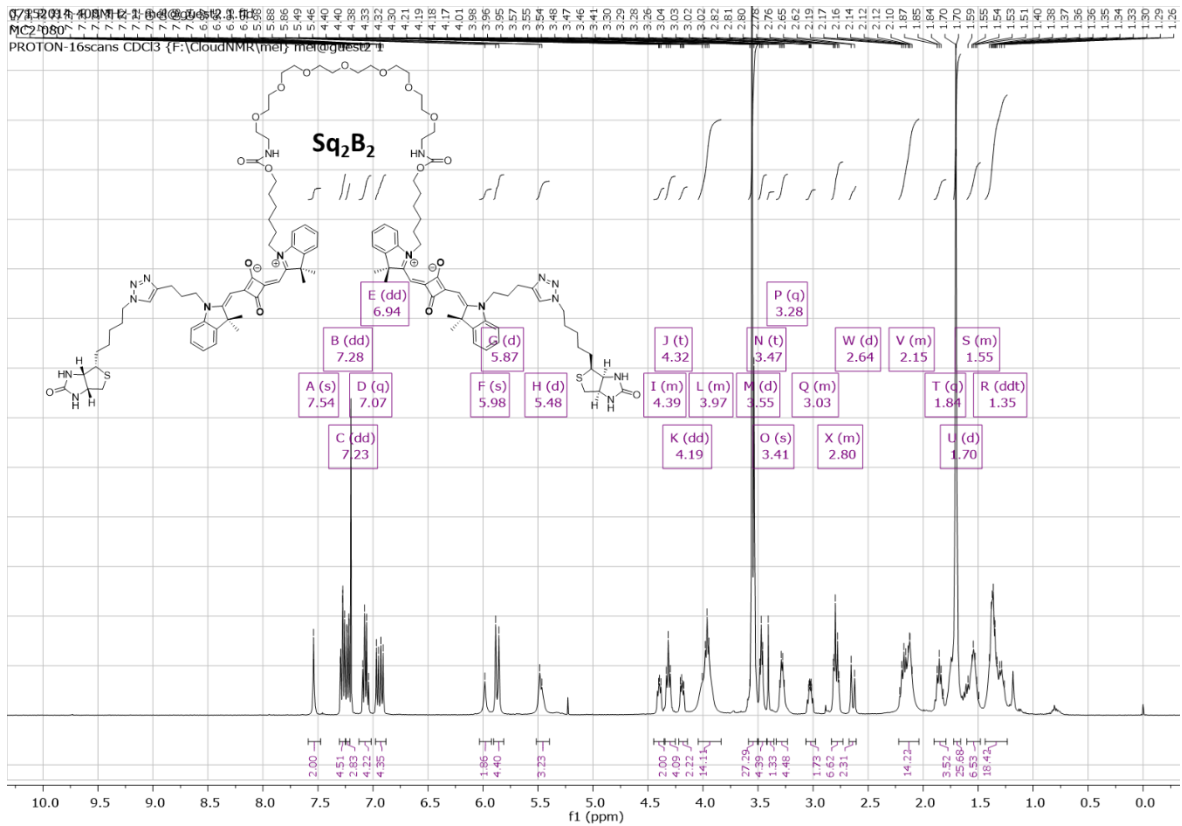

$^1\text{H}$  NMR spectrum of  $\text{Sq}_2\text{B}_2$

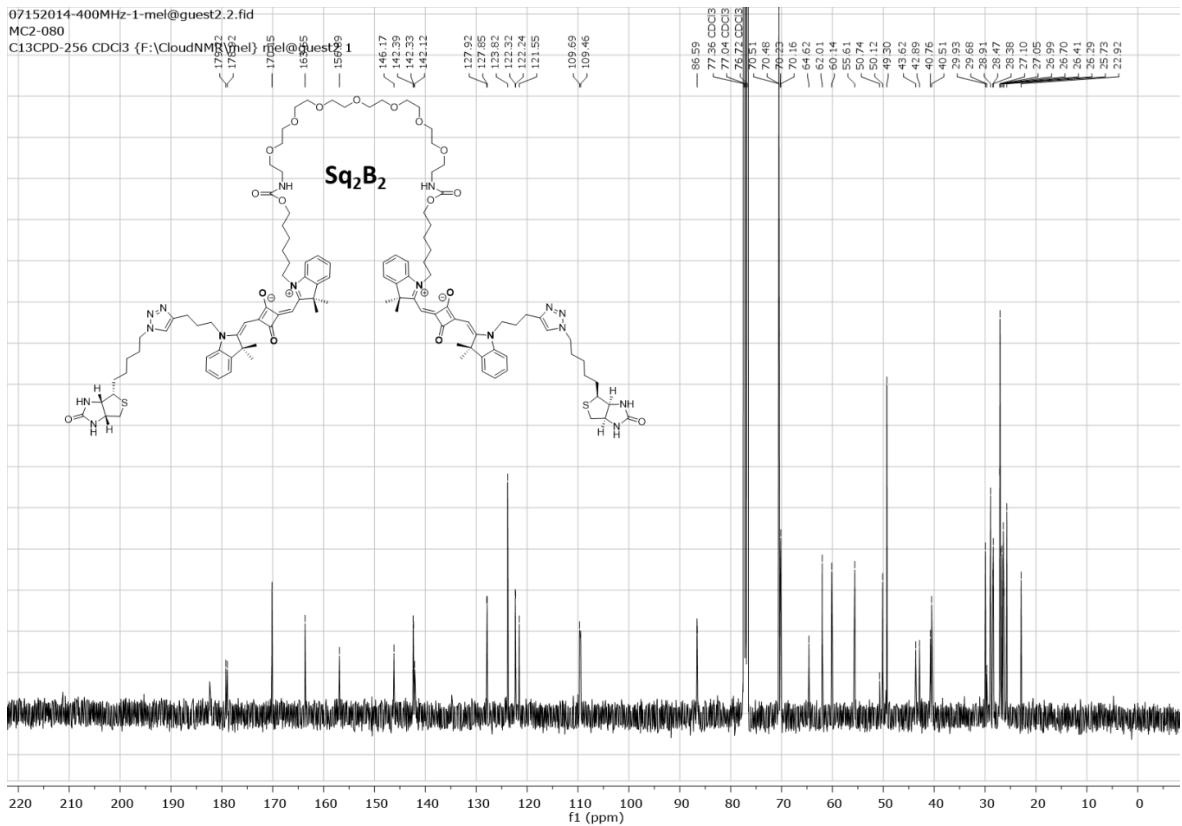

$^{13}\text{C}$  NMR spectrum of  $\text{Sq}_2\text{B}_2$

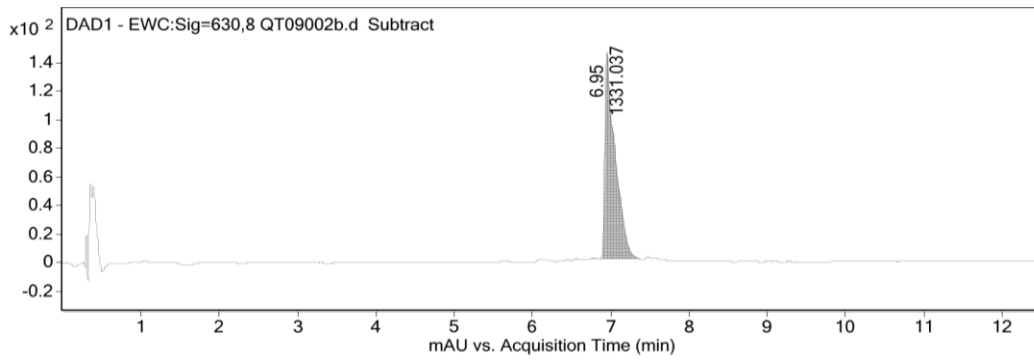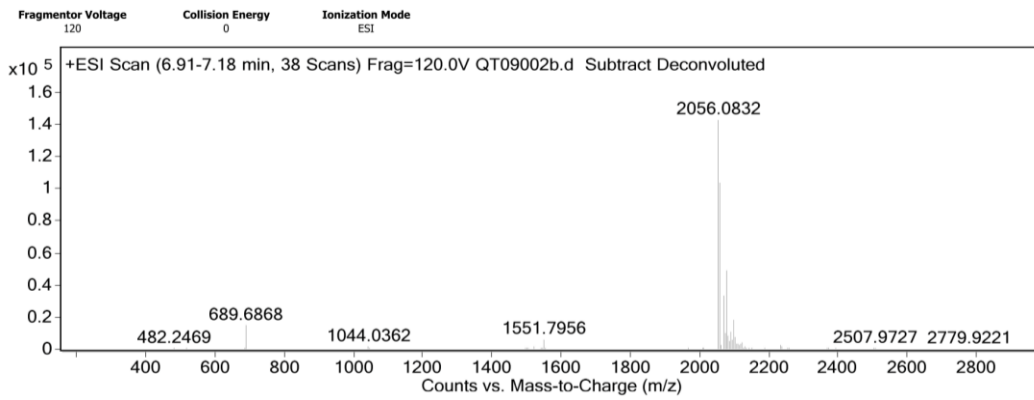

HP-LC chromatogram and HR-MS spectrum of Sq<sub>2</sub>B<sub>2</sub>

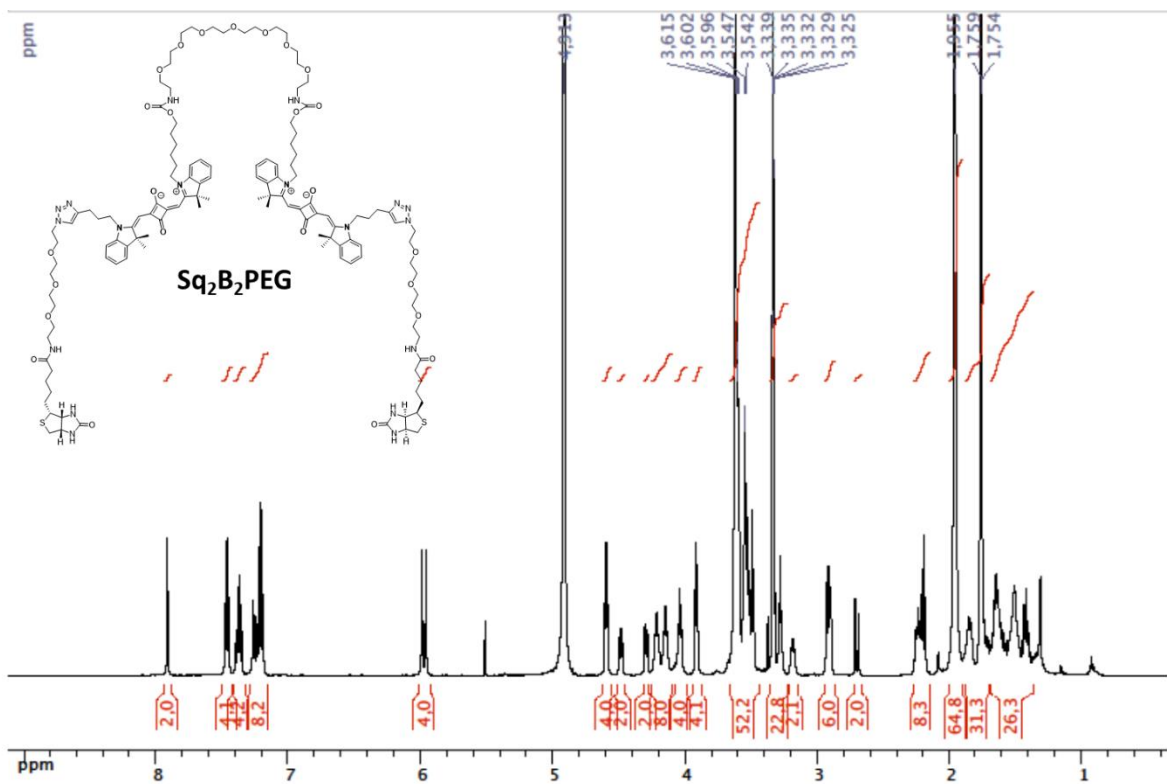

$^1\text{H}$  NMR spectrum of Sq<sub>2</sub>B<sub>2</sub>PEG

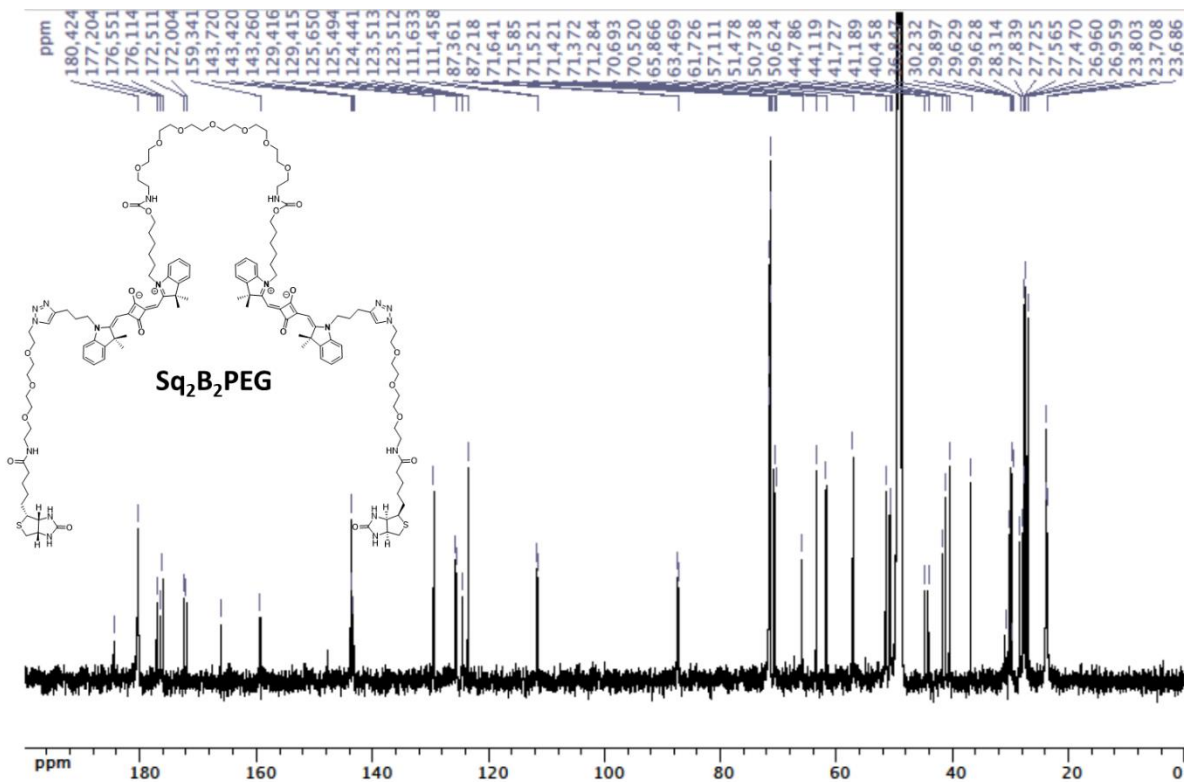

$^{13}\text{C}$  NMR spectrum of Sq<sub>2</sub>B<sub>2</sub>PEG



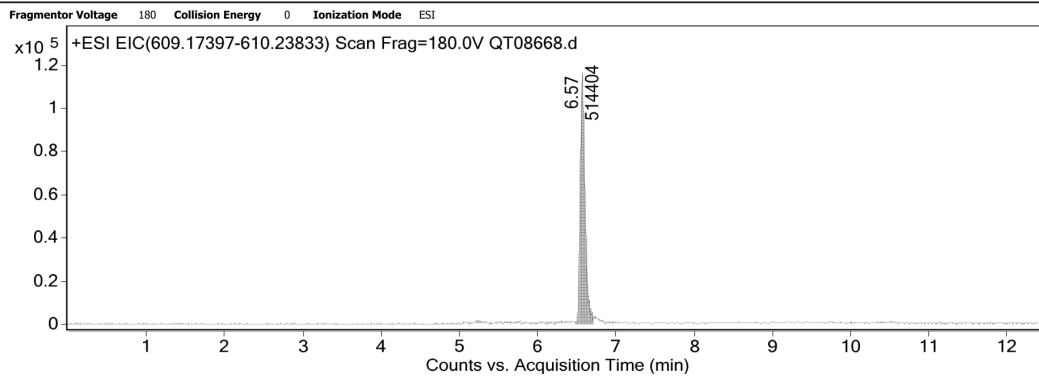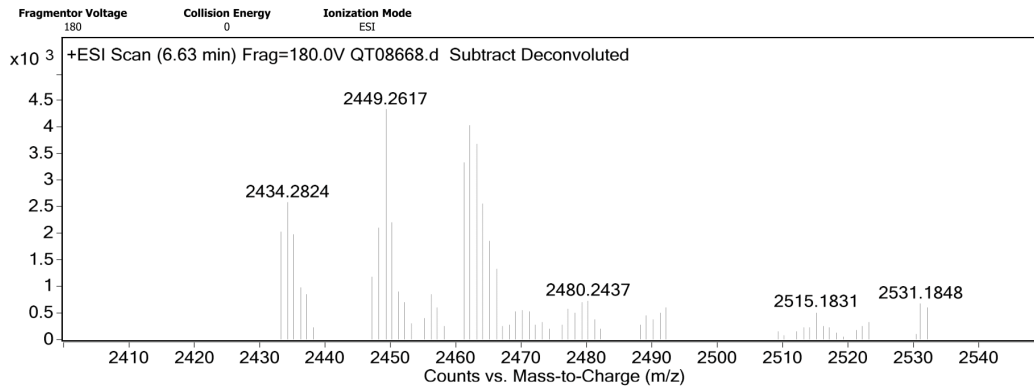

HP-LC chromatogram and HR-MS spectrum of Sq<sub>2</sub>B<sub>2</sub>PEG

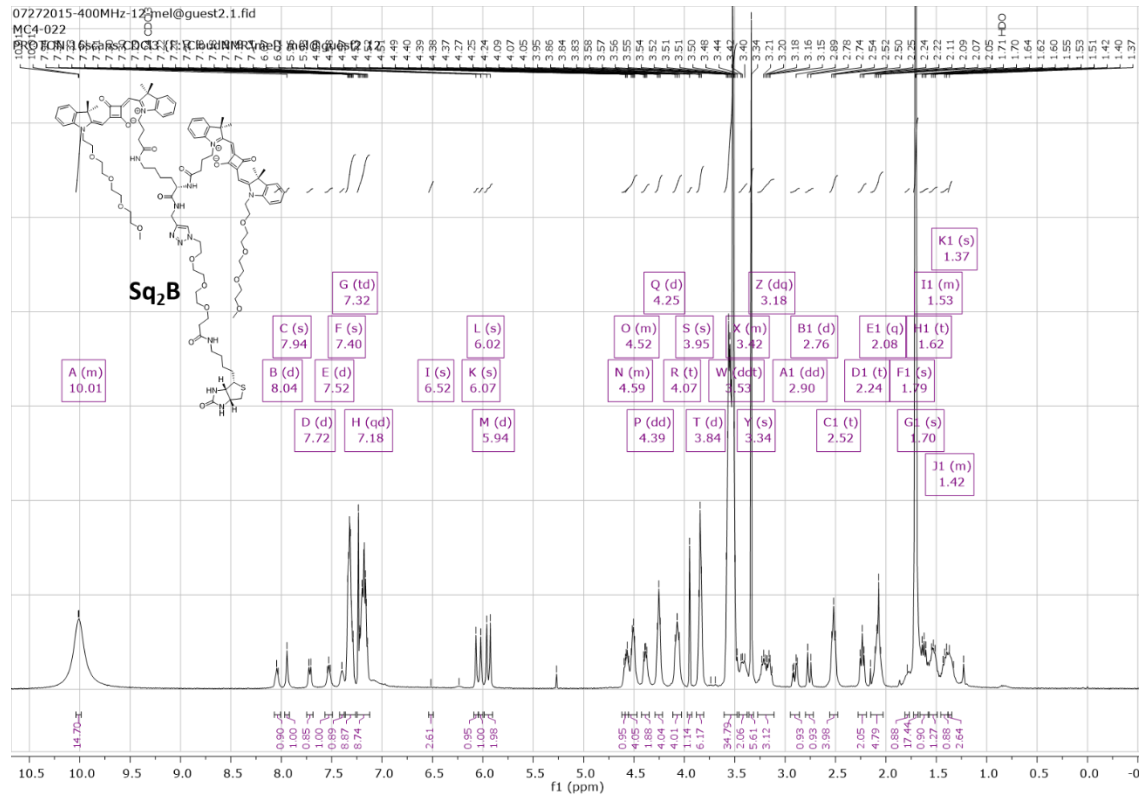

<sup>1</sup>H NMR spectrum of Sq<sub>2</sub>B

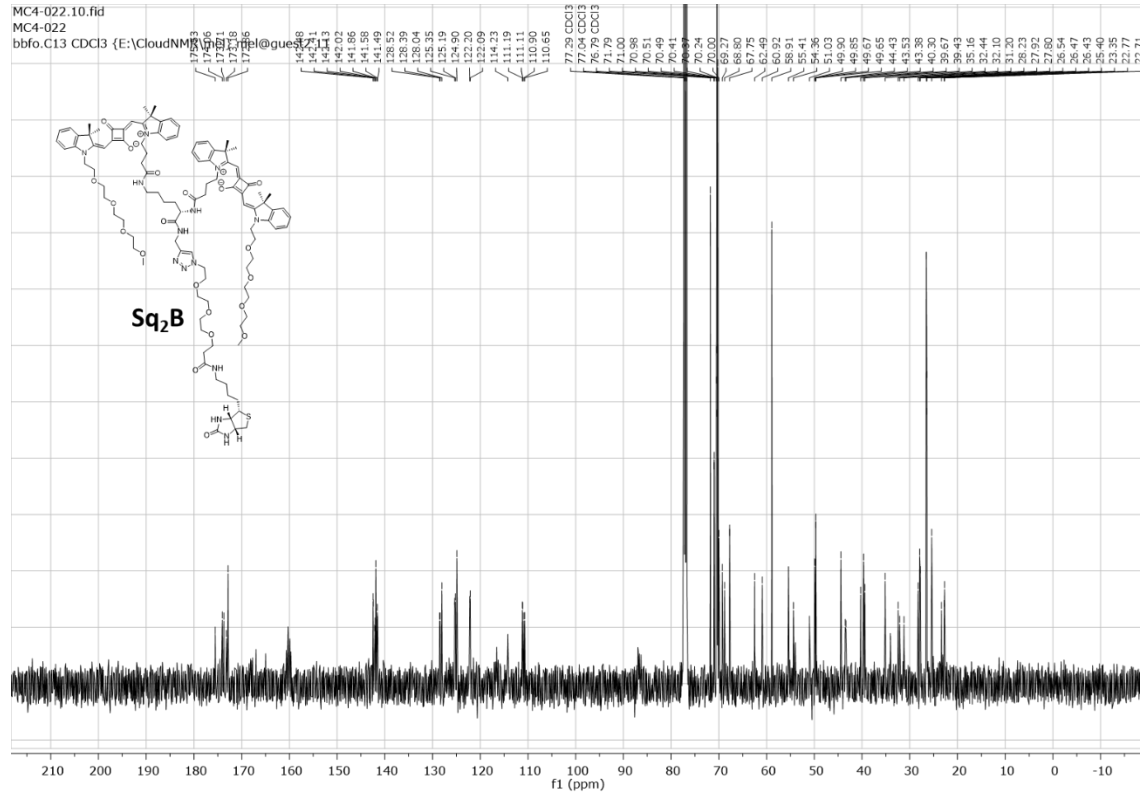

<sup>13</sup>C NMR spectrum of Sq<sub>2</sub>B

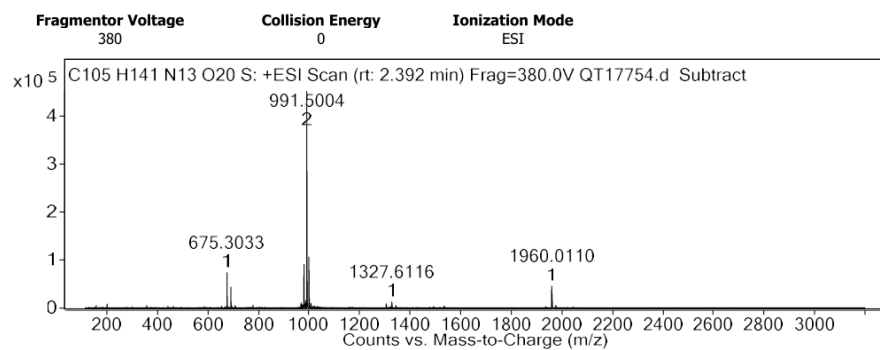

HR-MS spectrum of Sq<sub>2</sub>B

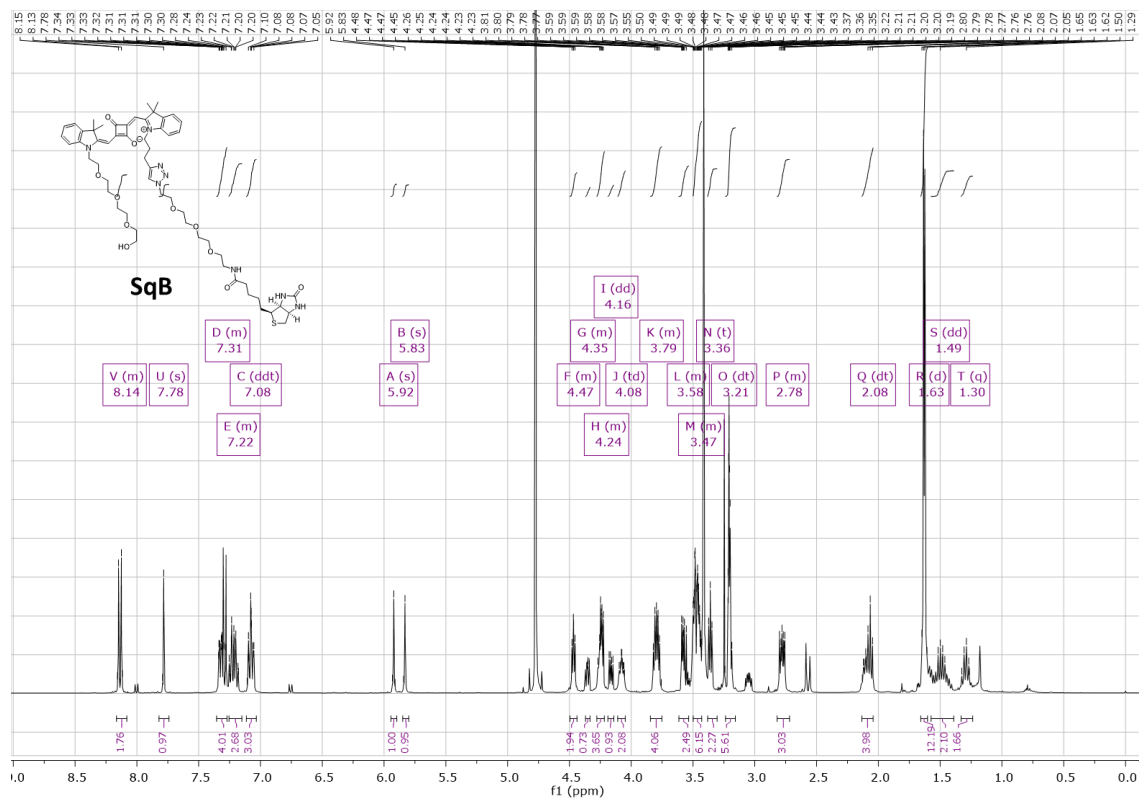

<sup>1</sup>H NMR spectrum of SqB

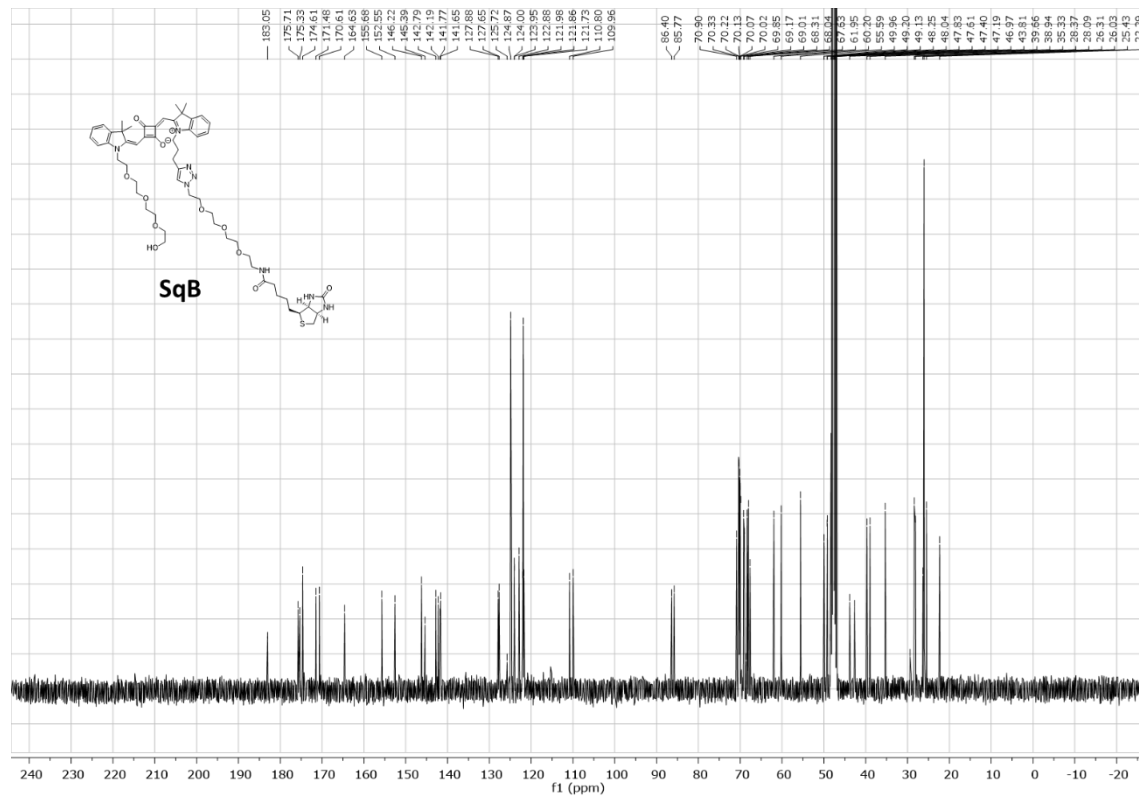

<sup>13</sup>C NMR spectrum of SqB

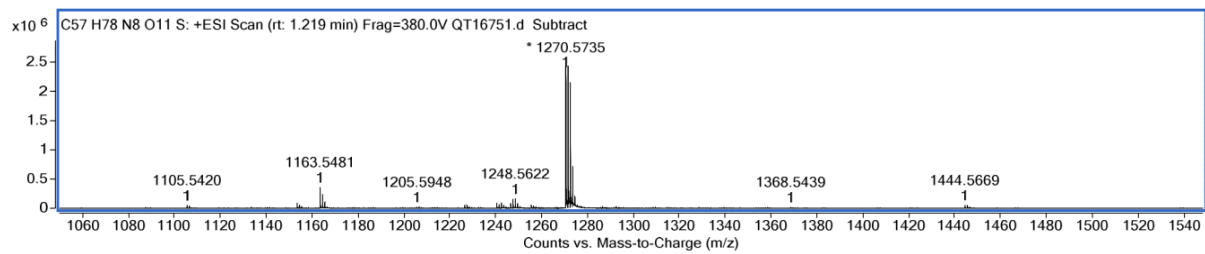

HR-MS spectrum of SqB

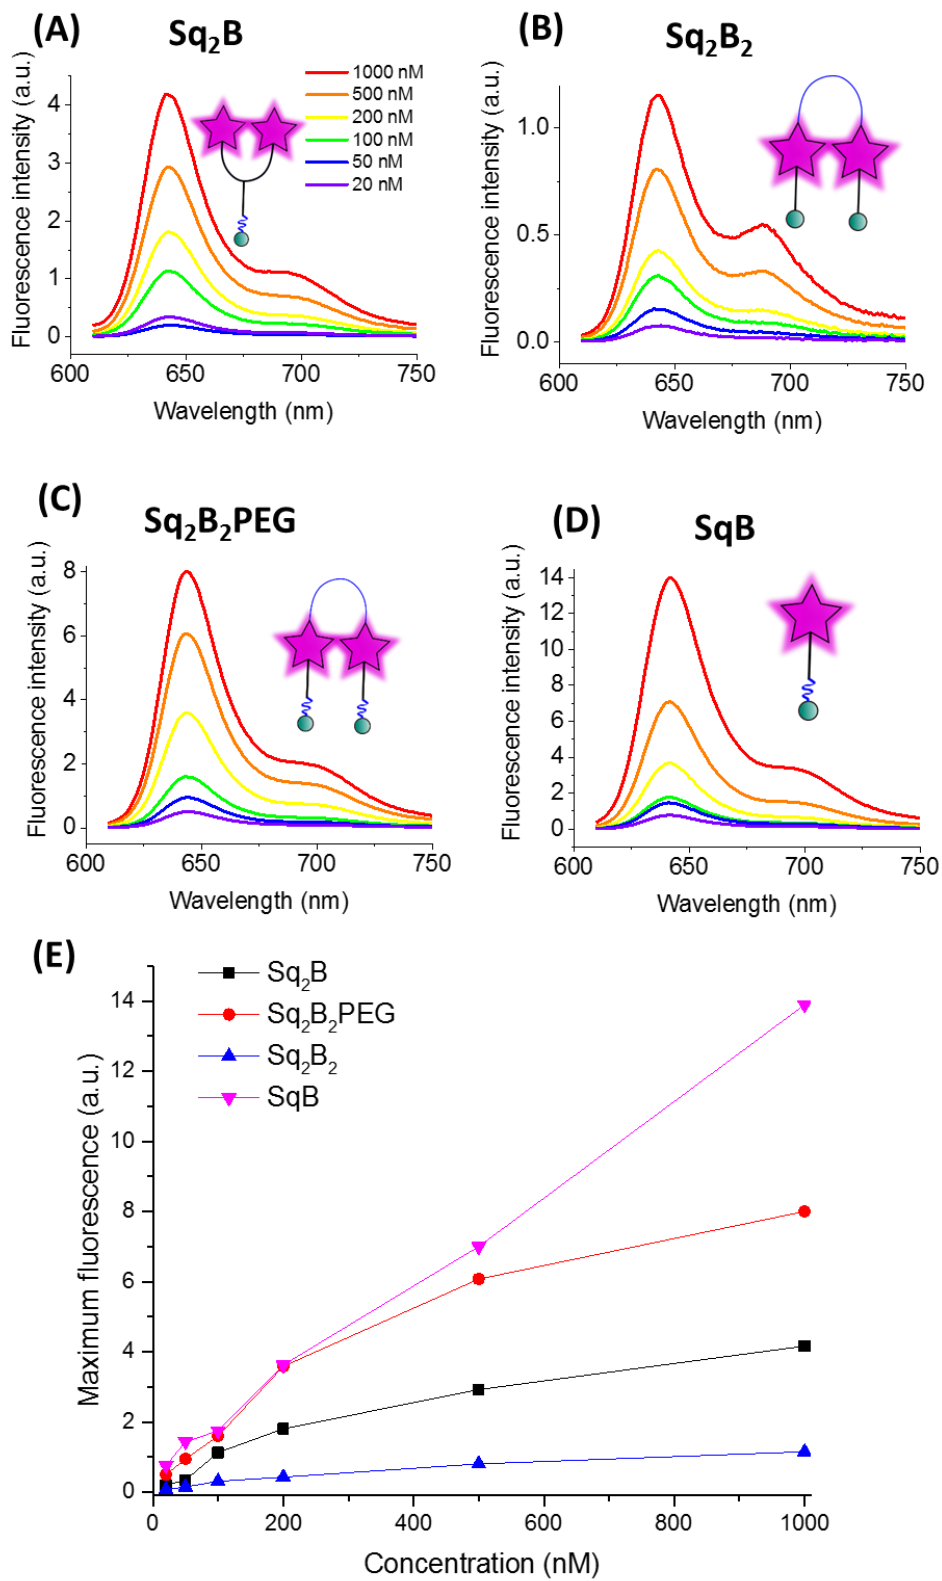

**Fig. S1.** Fluorescence spectra of Sq<sub>2</sub>B (A), Sq<sub>2</sub>B<sub>2</sub> (B), Sq<sub>2</sub>B<sub>2</sub>PEG (C) and SqB (D) at different concentrations in water. (E) Plot of fluorescence maxima from A-D of Sq<sub>2</sub>B, Sq<sub>2</sub>B<sub>2</sub>, Sq<sub>2</sub>B<sub>2</sub>PEG and SqB.

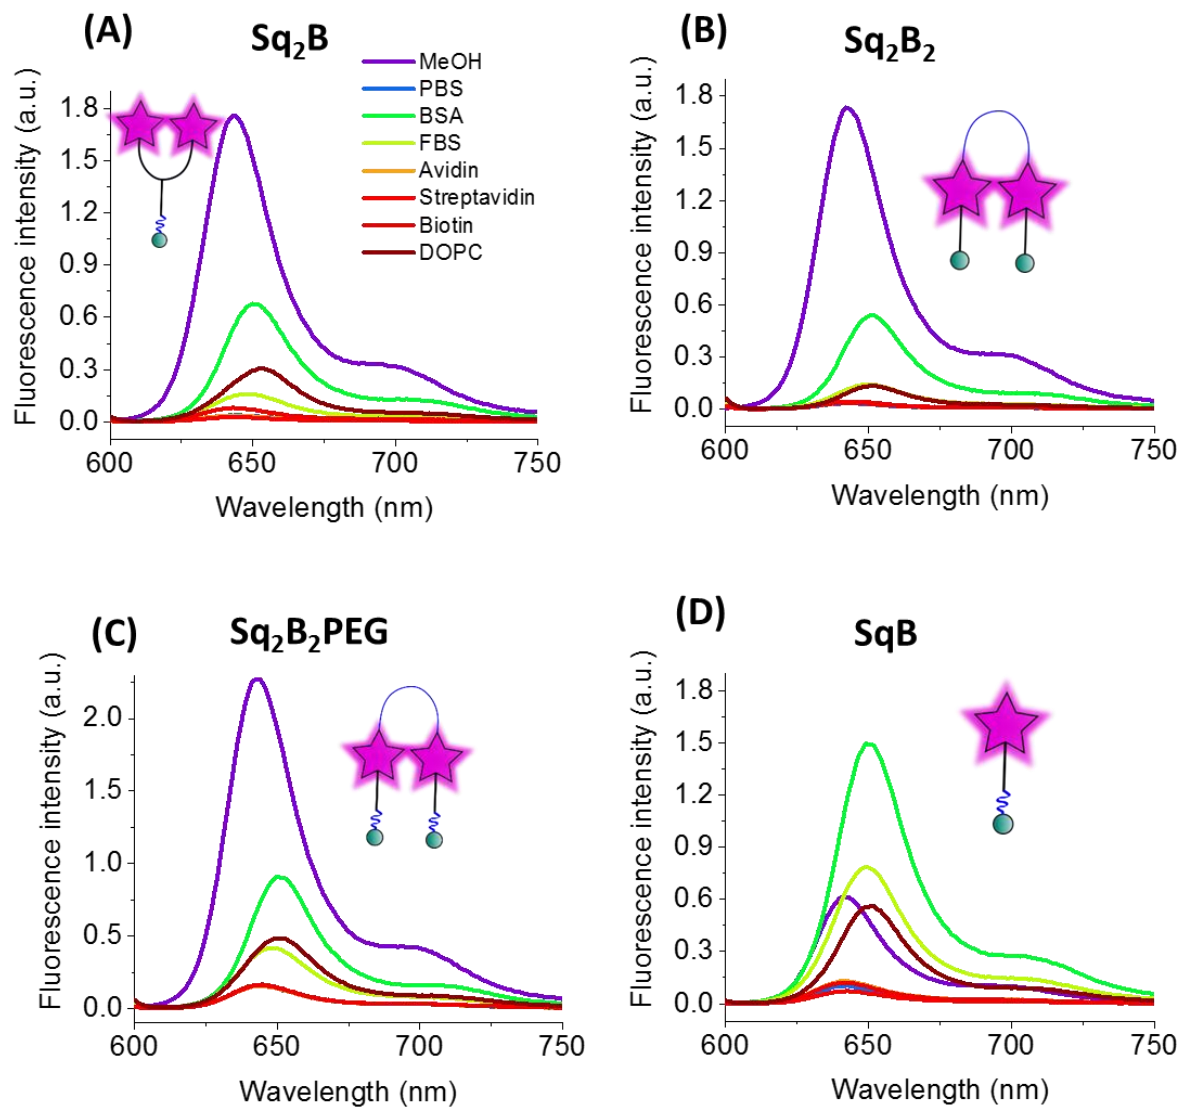

**Fig. S2.** Fluorescence spectra of 0.2  $\mu$ M of Sq<sub>2</sub>B (A), Sq<sub>2</sub>B<sub>2</sub> (B), Sq<sub>2</sub>B<sub>2</sub>PEG (C) and SqB (D) in MeOH, PBS, in the presence of BSA (0.1 mg/mL), FBS (0.1 mg/mL), avidin (100 nM), streptavidin (100 nM), biotin (100  $\mu$ M) or DOPC (20  $\mu$ M).

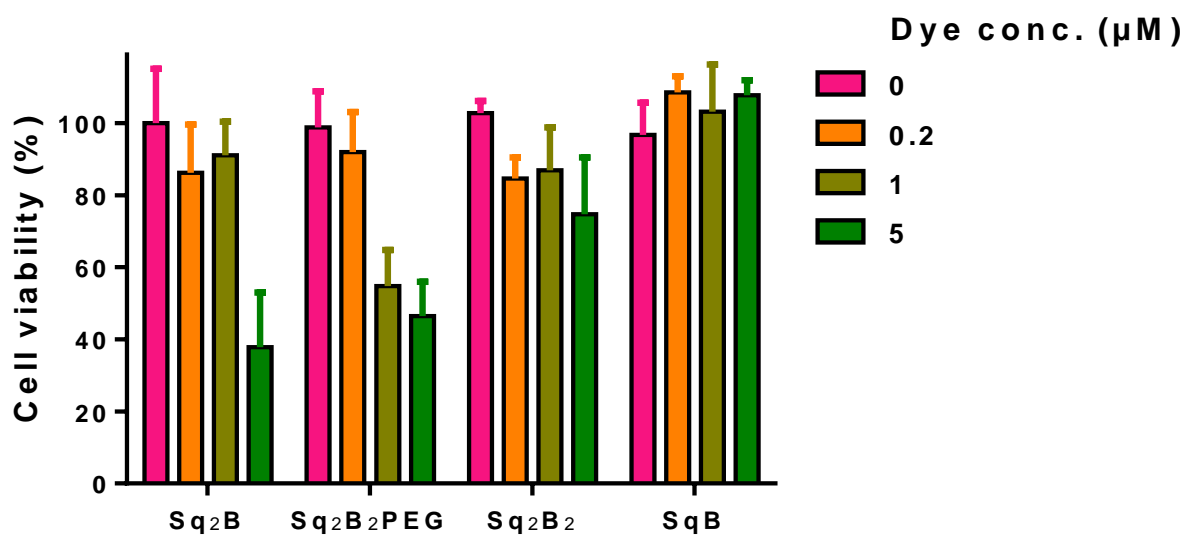

Fig. S3. Cytotoxicity of the probes after 24h incubation with KB cells determined by the MTT assay.



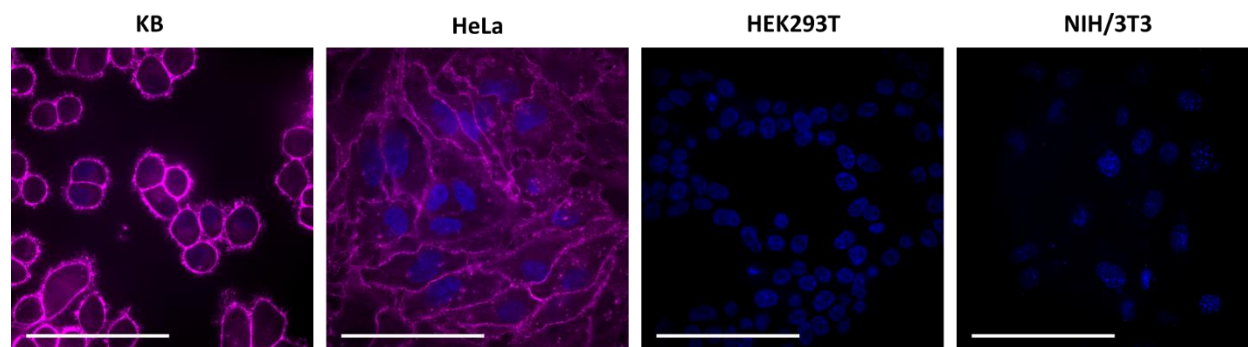

**Fig. S4.** Live cell fluorescence imaging of Sq<sub>2</sub>B (0.2 μM) in cancer HeLa, KB cells and non-cancer HEK293T and NIH/3T3 cells. In all cases, the probe was incubated for 5 min at rt. Nuclei were labelled with Hoescht (5 μg/mL). Scale bar, 100 μm.

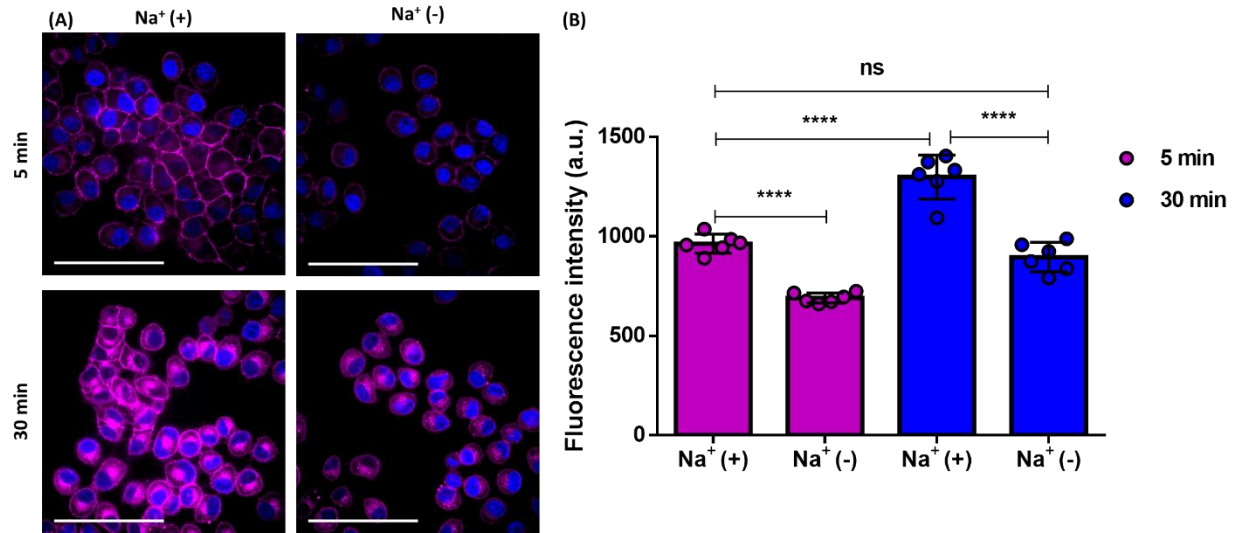

**Fig. S5.** Effect of Na<sup>+</sup>-depletion in the buffer on internalization of Sq<sub>2</sub>B. (A) Live-cell fluorescence imaging in KB cells of Sq<sub>2</sub>B (0.2 μM) incubated for 5 or 30 min in Na<sup>+</sup>-HBSS or Na<sup>+</sup>-depleted HBSS buffer (Na<sup>+</sup> was replaced with choline) respectively. In all cases, the temperature was 37°C. Nuclei were labelled with Hoescht (5 μg/mL). Scale bar, 100 μm. (B) Analysis of fluorescence intensities from images (A). Bars represent mean value ± S.D. (n=6). Statistical significance based on unpaired t-test analysis: \*\*\*\*p<0.0001, ns - not significant.

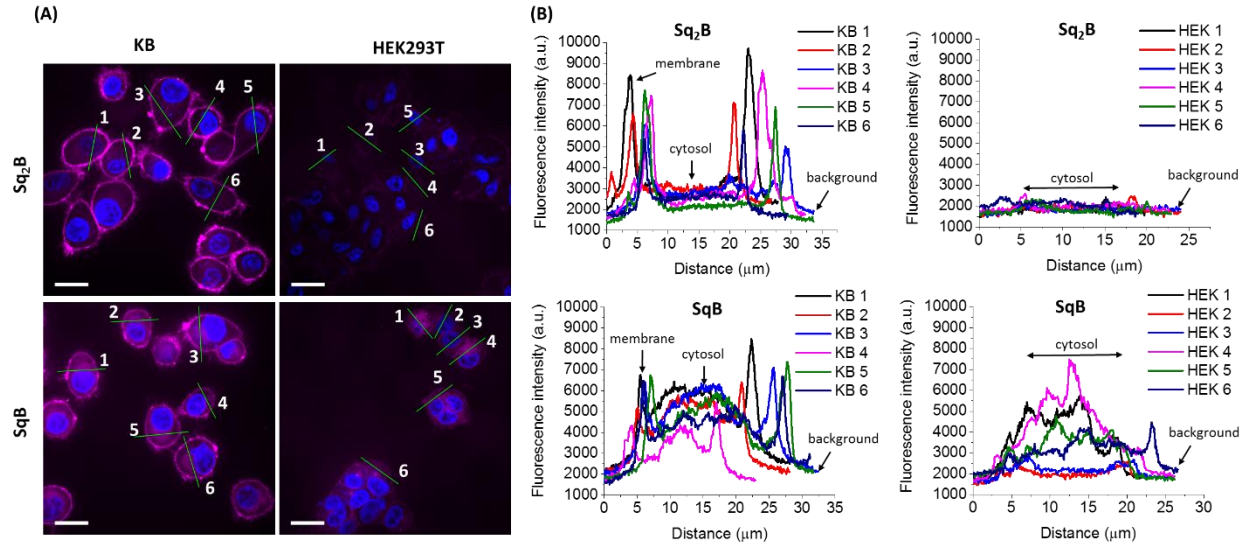

**Fig. S6.** Comparison of  $Sq_2B$  and  $SqB$  in cell imaging experiments. (A) Live-cell fluorescence images. Top panels:  $Sq_2B$  (0.2  $\mu M$ ) in BR-positive (KB) and BR-negative (HEK293T) cells. Bottom panels:  $SqB$  (0.2  $\mu M$ ) in BR-positive (KB) and BR-negative (HEK293T) cells. In all cases, the probe was incubated for 5 min at rt. Nuclei were labelled with Hoescht (5  $\mu g/mL$ ). Scale bar, 20  $\mu m$ . (B) Fluorescence intensity profiles along ROIs (green lines) across individual cells ( $n=6$ ) from images A.
